# Supplementary material
Source: PubMed Central journal article supplement (PMC2888690)

Supporting Information for :

SAR Studies for a New Class of Antibacterial NAD  
Biosynthesis Inhibitors

*Whitney Beyscelance Moro,<sup>a,b</sup> Zhengrong Yang,<sup>a,b</sup> Tasha A. Kane,<sup>b</sup> Qingxian Zhou,<sup>b</sup> Steve Harville,<sup>a</sup>  
Christie G. Brouillette<sup>a,b</sup> and Wayne J. Brouillette<sup>a,b\*</sup>*

<sup>a</sup>Department of Chemistry, University of Alabama at Birmingham, 901 14<sup>th</sup> Street South, Birmingham,  
Alabama 35294, USA

<sup>b</sup>Center for Biophysical Sciences & Engineering, University of Alabama at Birmingham, 1025 18<sup>th</sup>  
Street South, Birmingham, Alabama 35294, USA

\* [wbrou@uab.edu](mailto:wbrou@uab.edu). Phone: 1-205-934-8288. Fax 1-205-934-2543.



# <sup>1</sup>H NMR Spectrum of Compound 7{1,2}

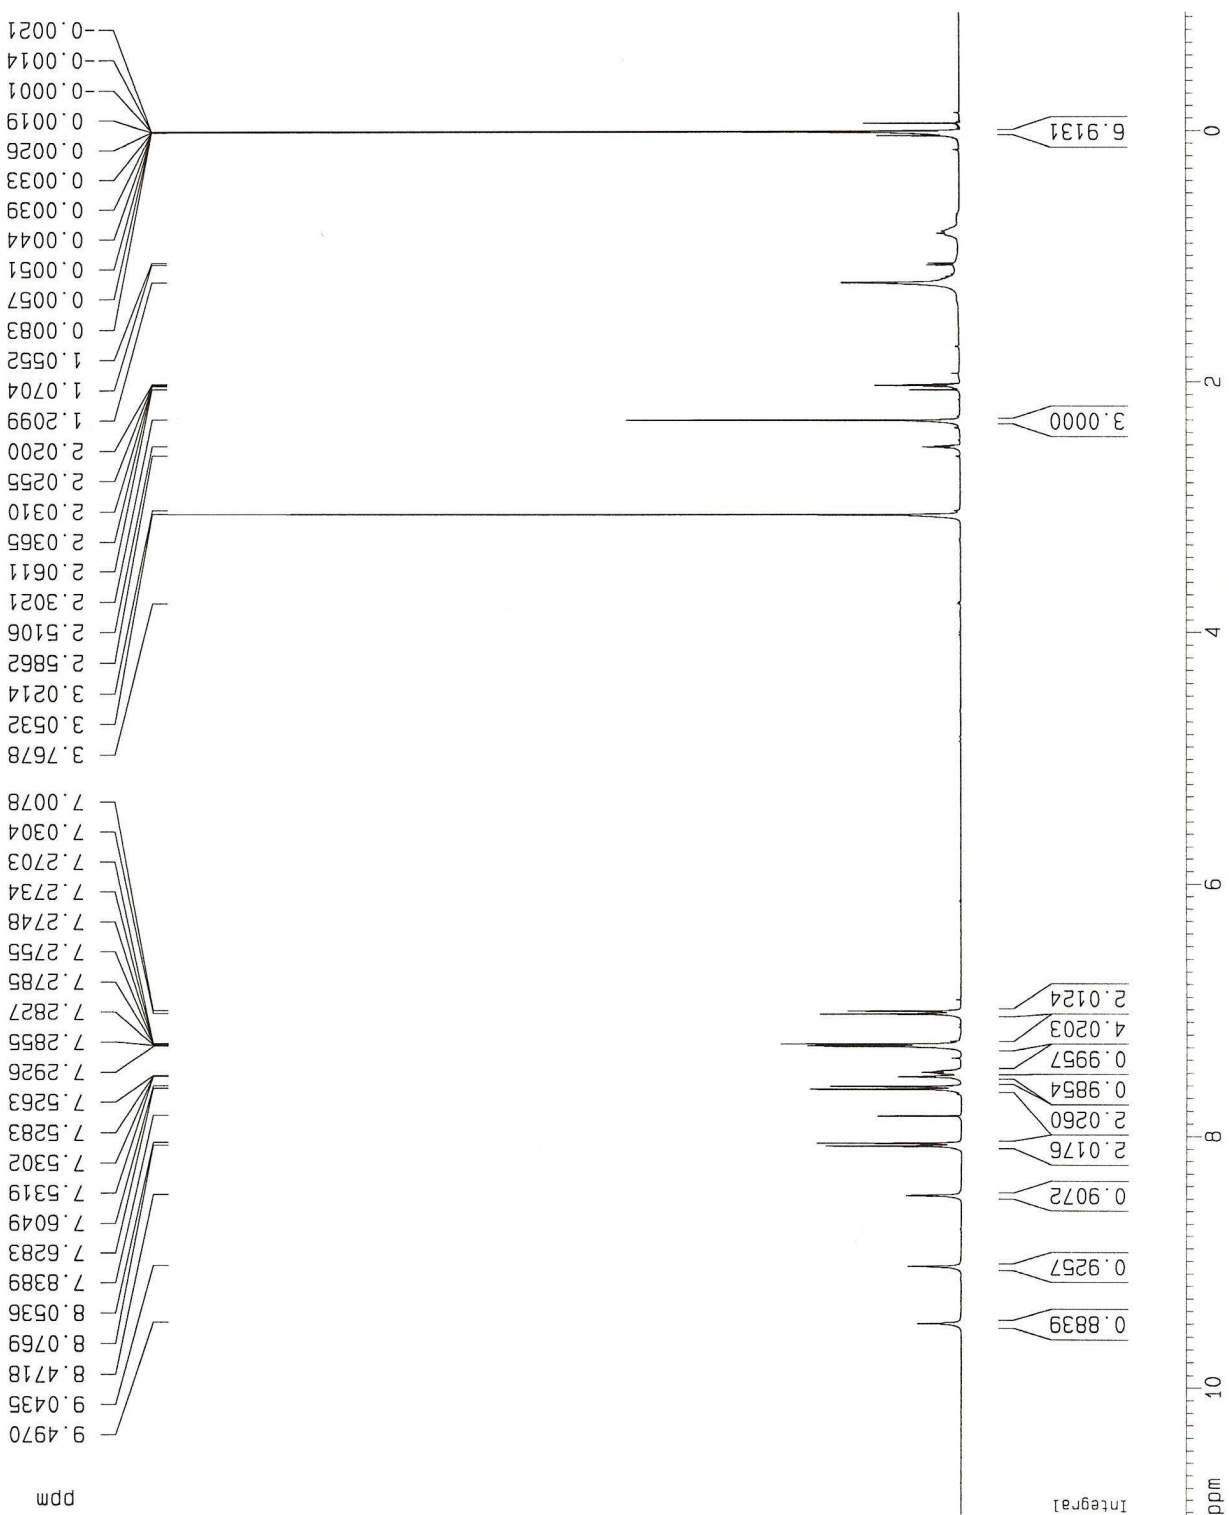

# <sup>1</sup>H NMR Spectrum of Compound 7{3,3}

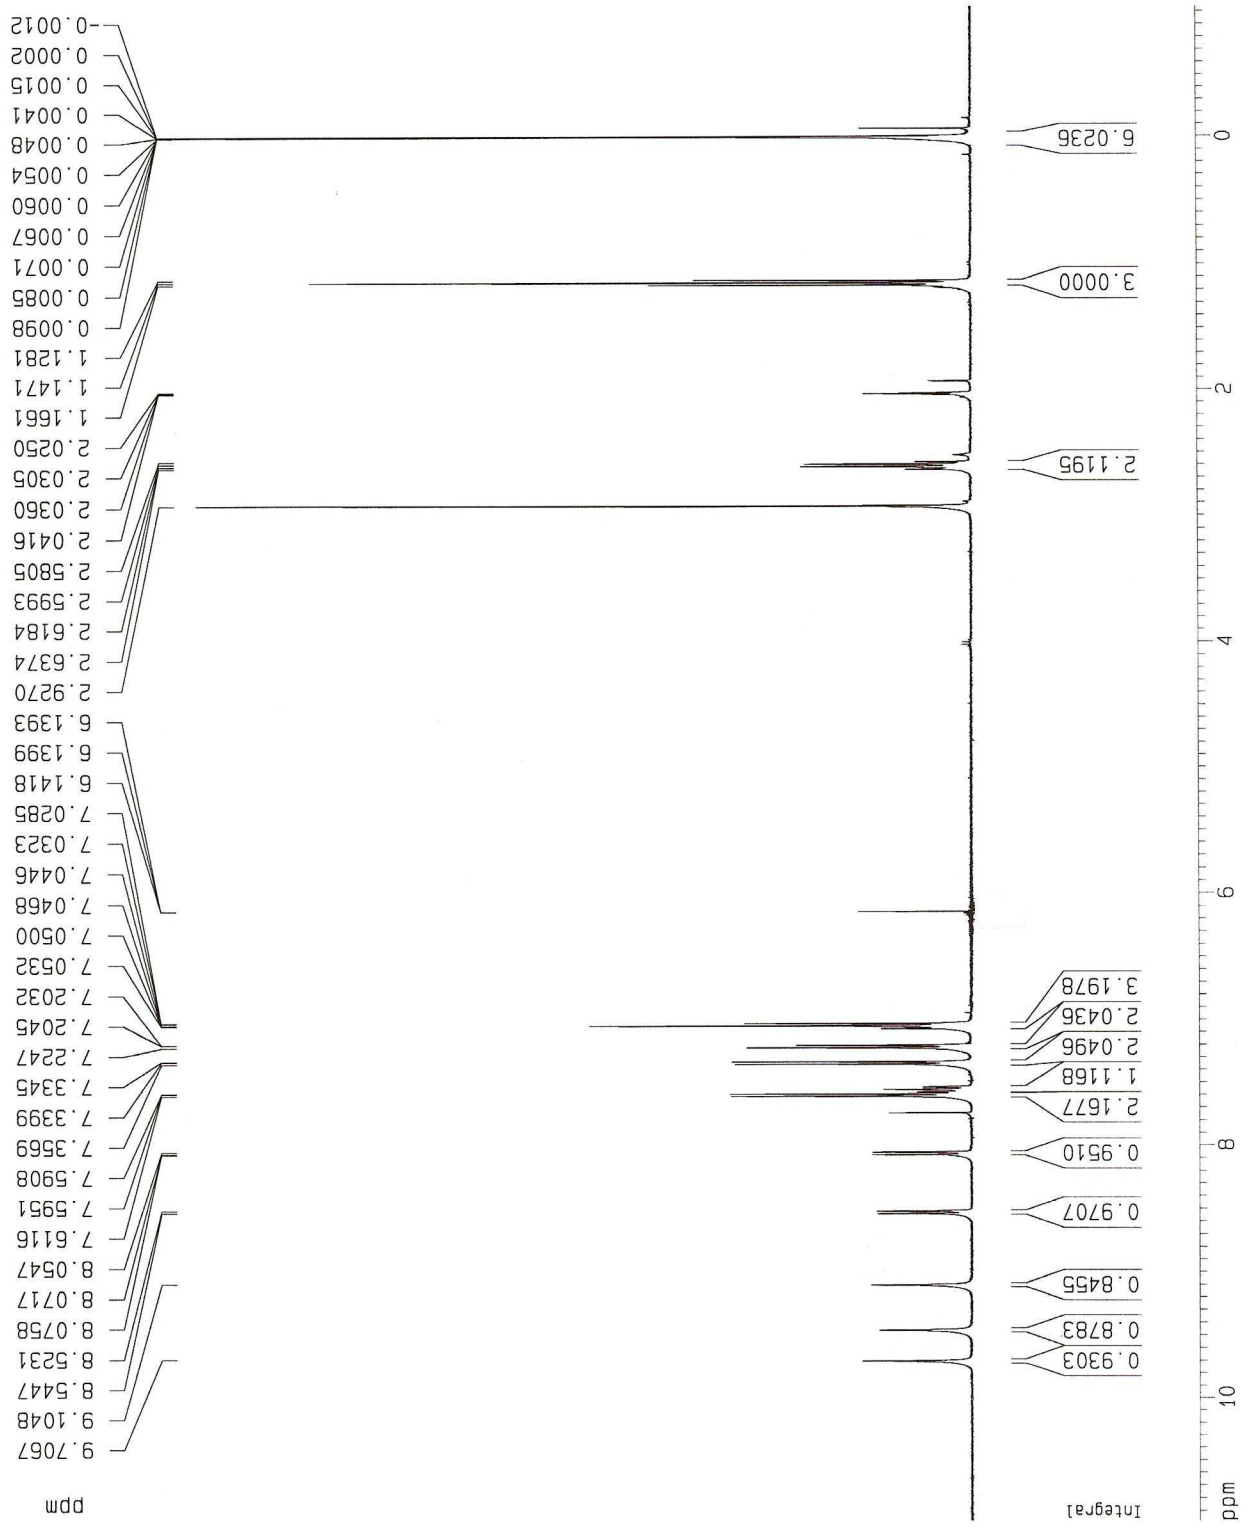

# $^1\text{H}$ NMR Spectrum of Compound 7{1,5}

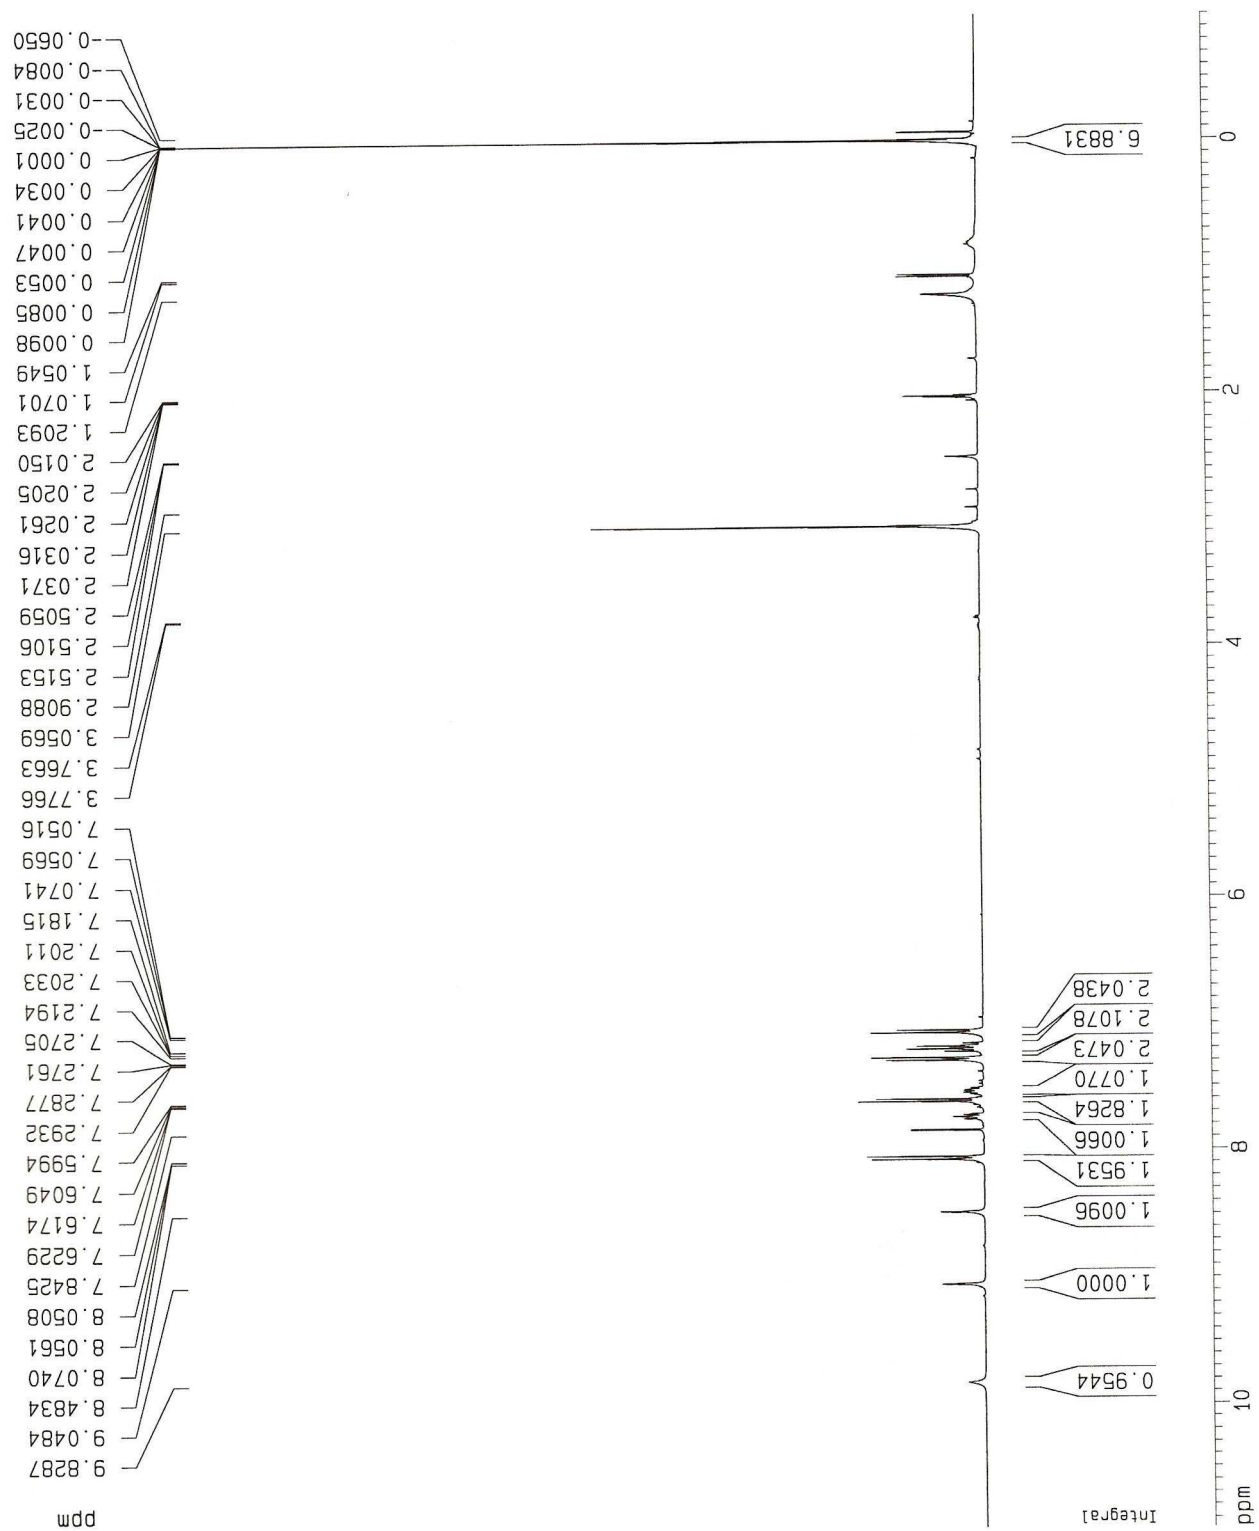



# <sup>1</sup>H NMR Spectrum of Compound 7{1,6}

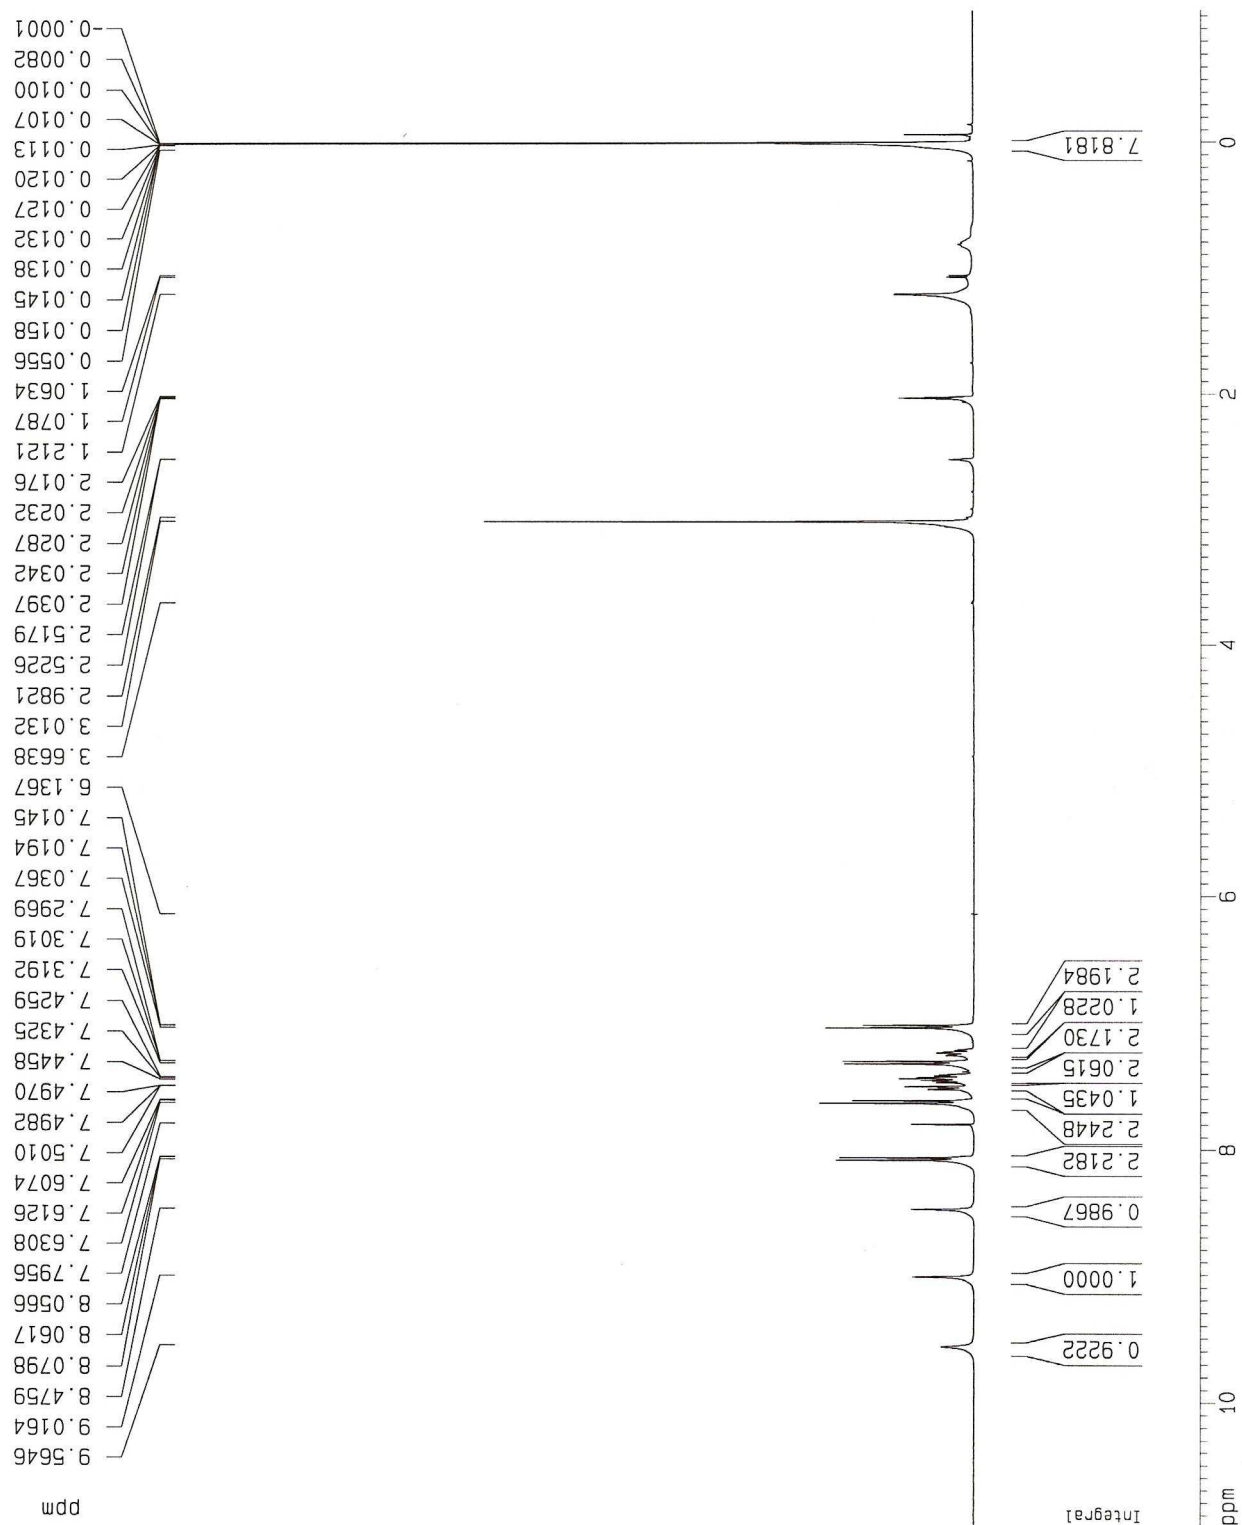

# <sup>1</sup>H NMR Spectrum of Compound 7{2,7}

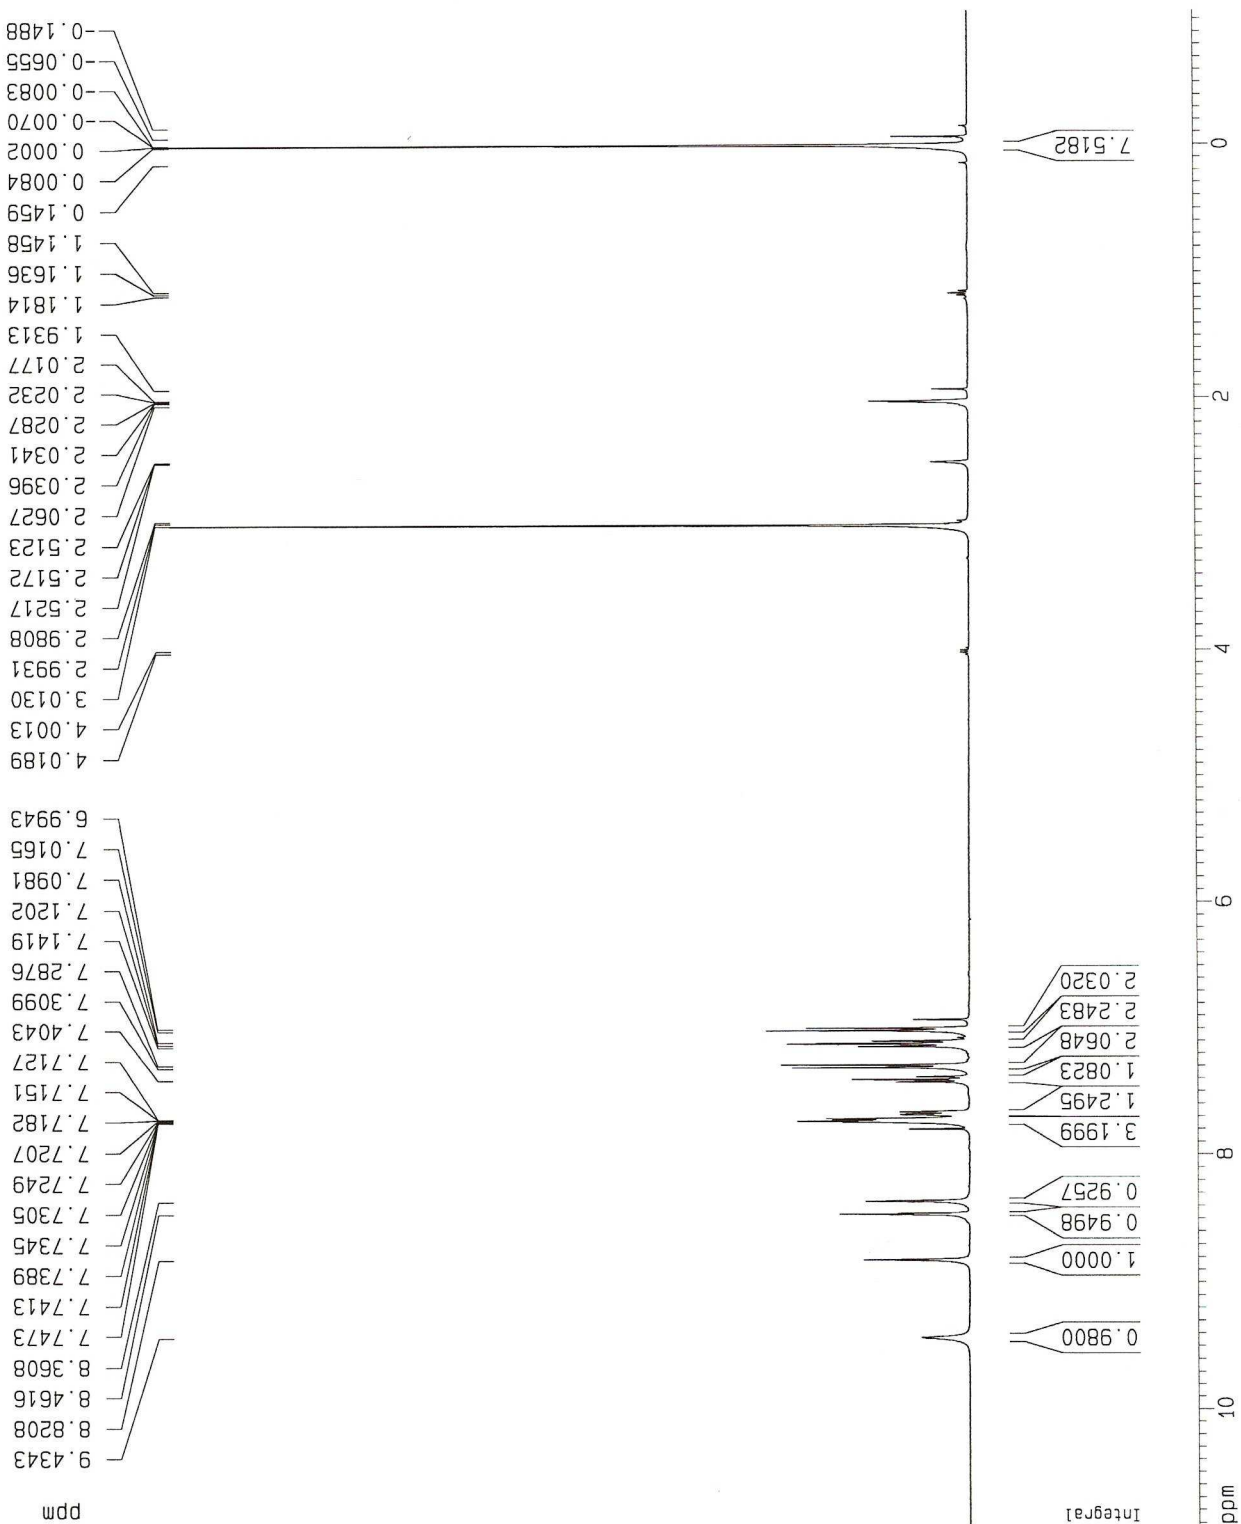





# <sup>1</sup>H NMR Spectrum of Compound 7{3,9}

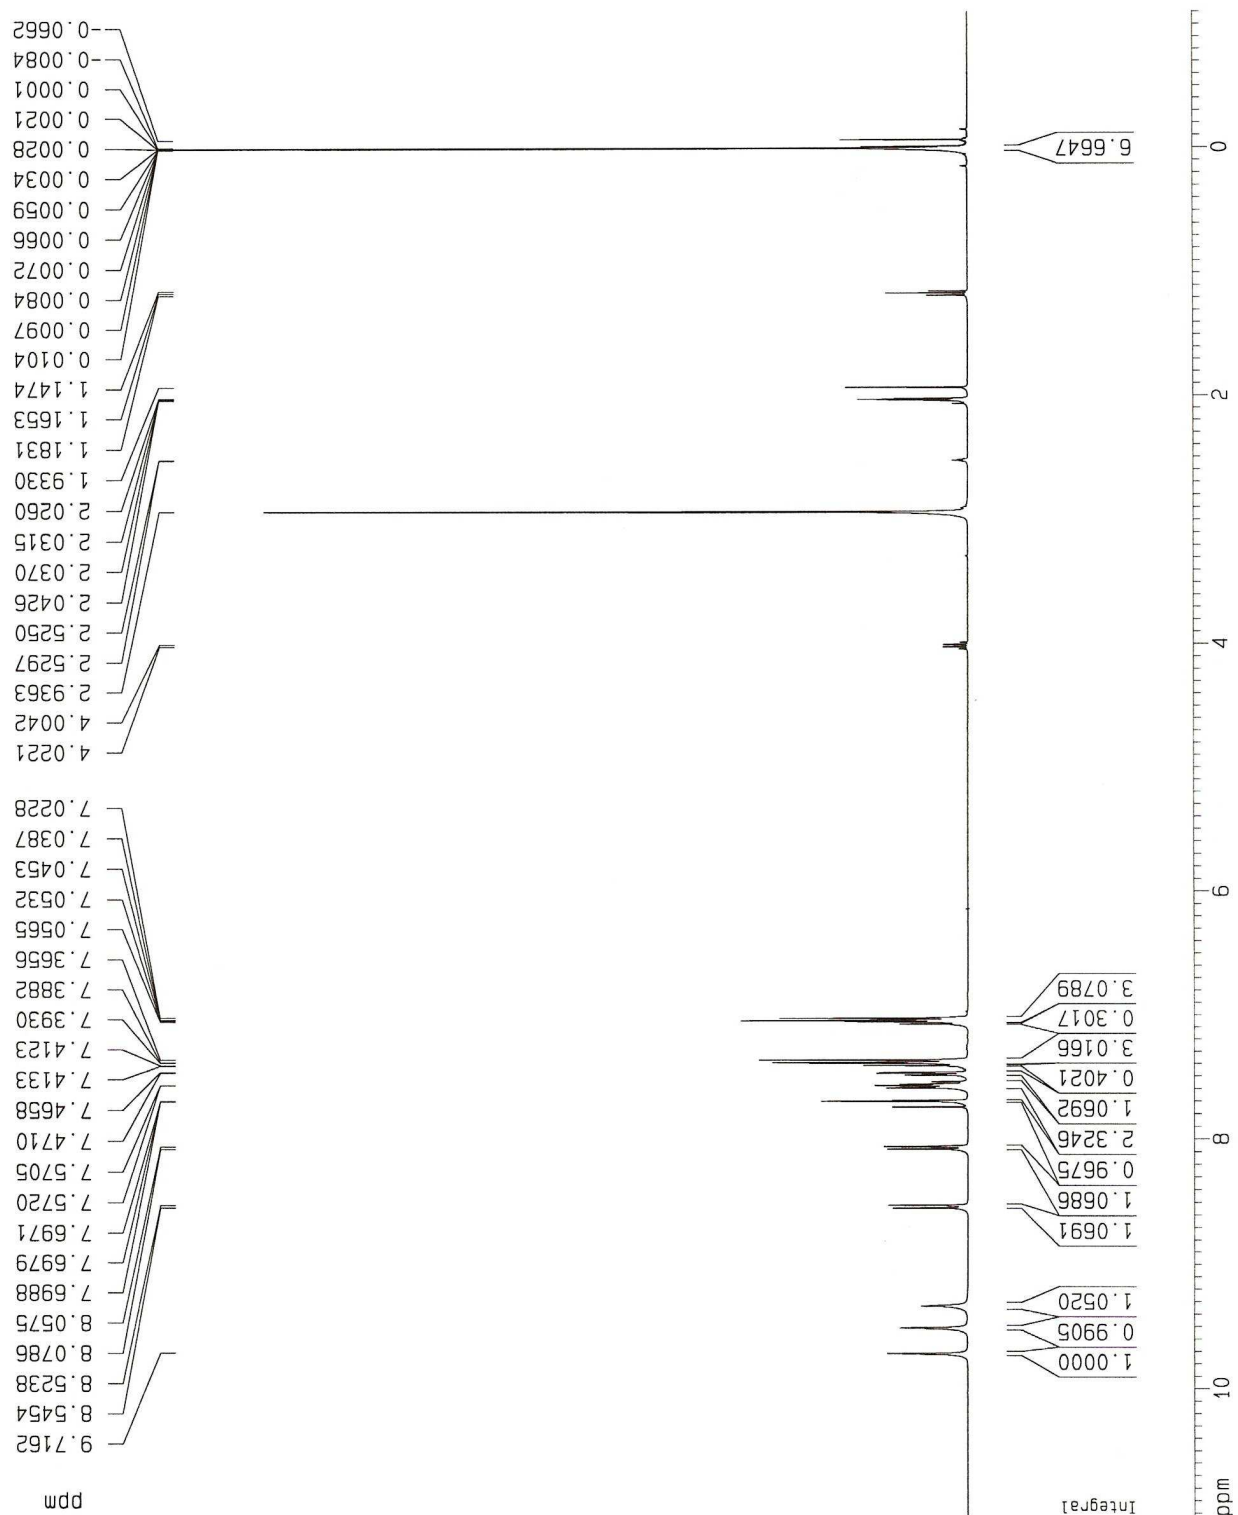

# <sup>1</sup>H NMR Spectrum of Compound 7{3,10}

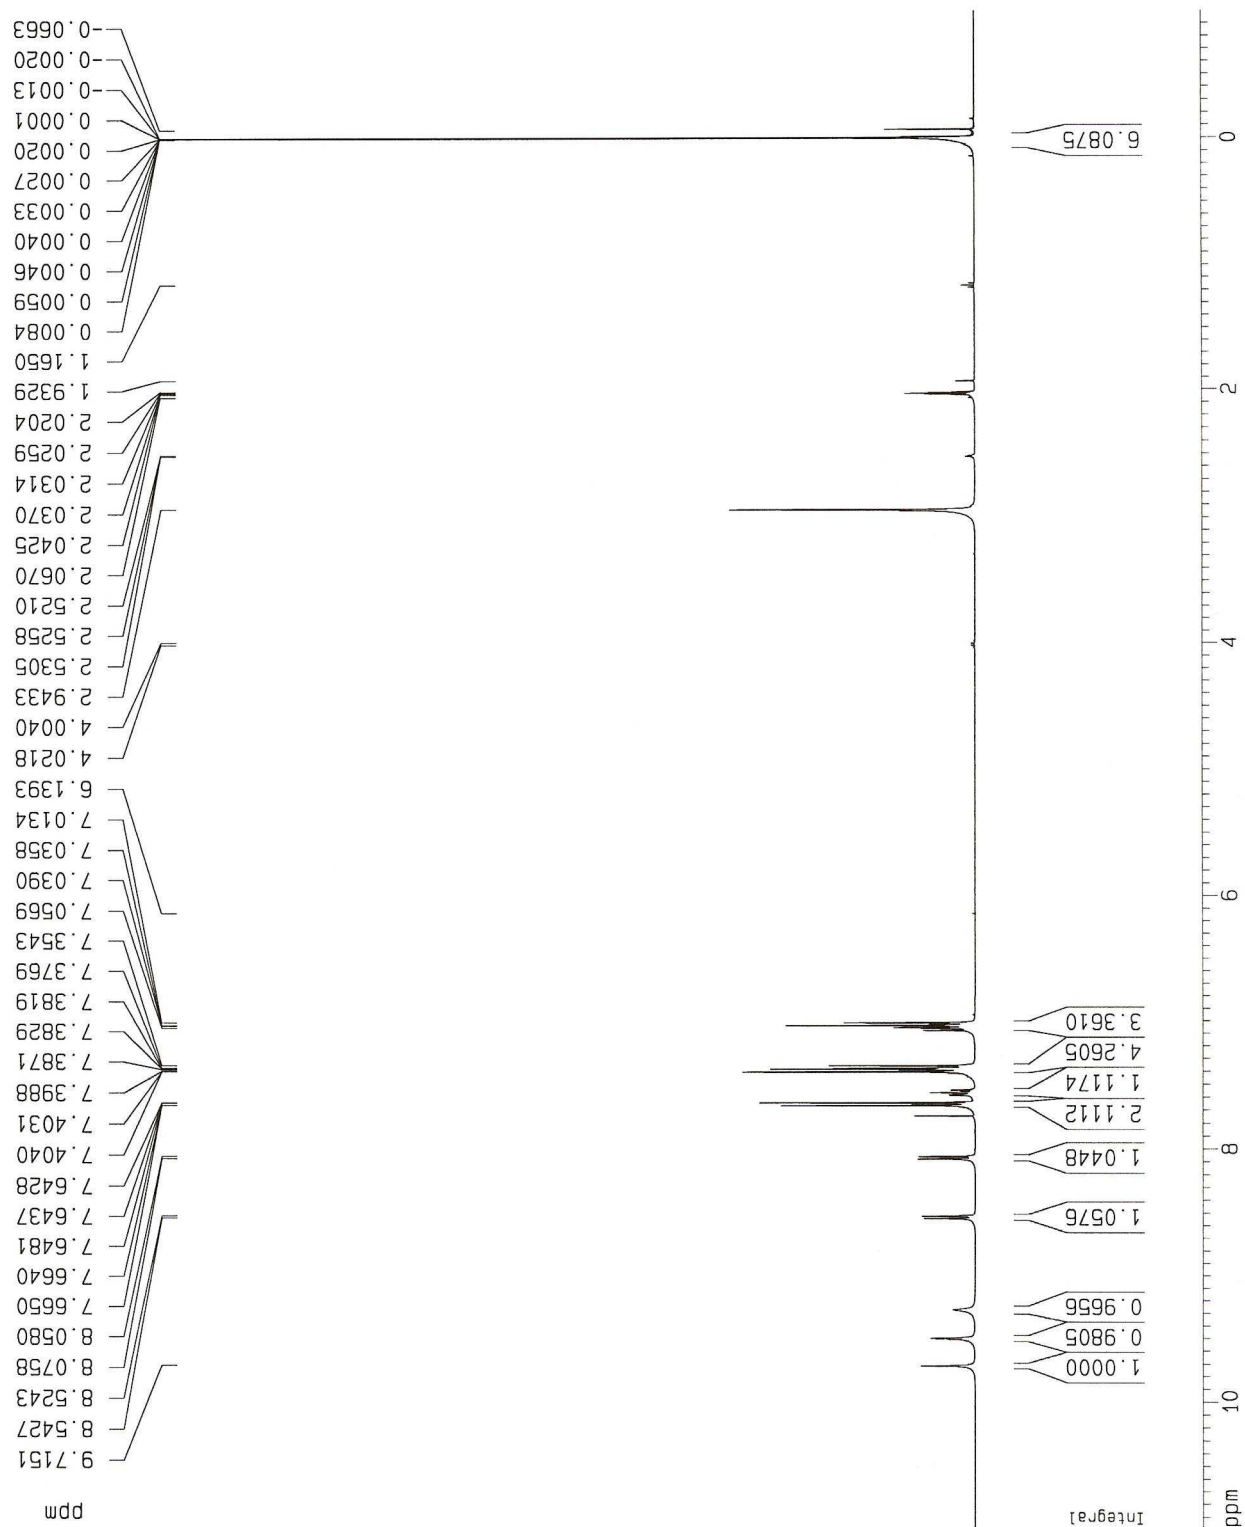

# <sup>1</sup>H NMR Spectrum of Compound 7{1,11}

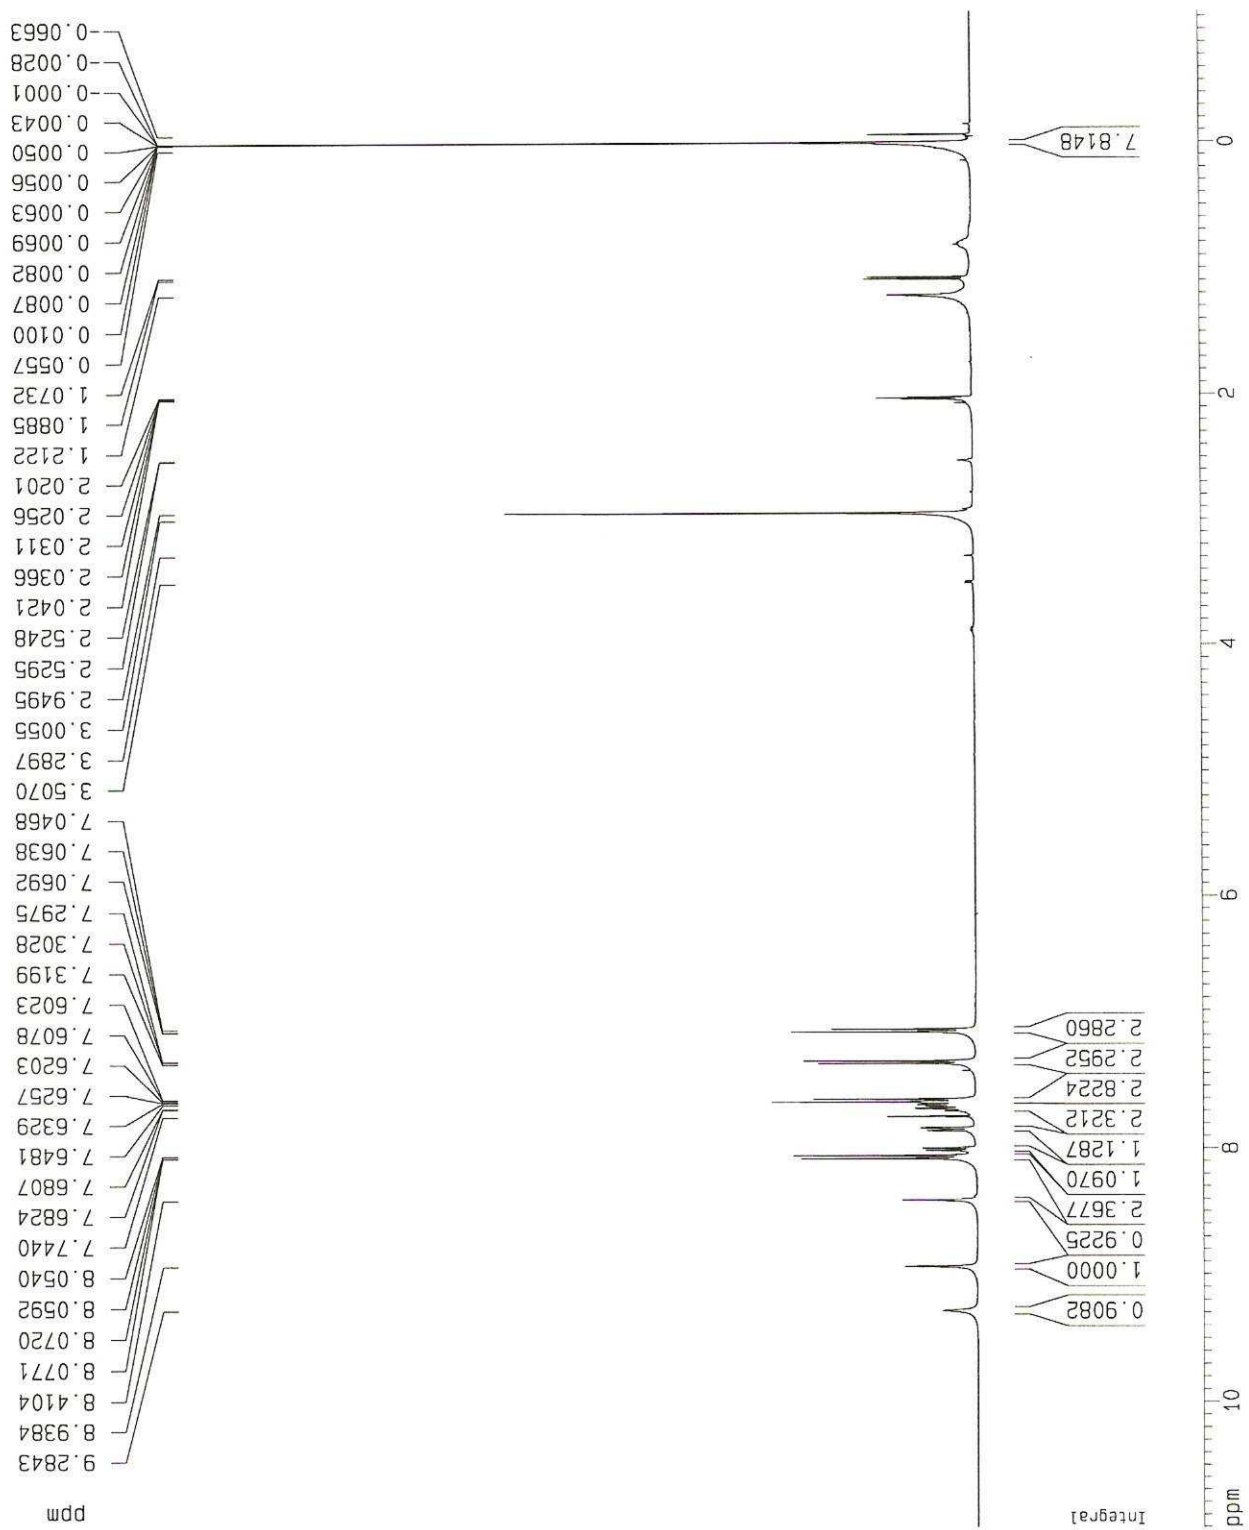

# <sup>1</sup>H NMR Spectrum of Compound 7{3,12}

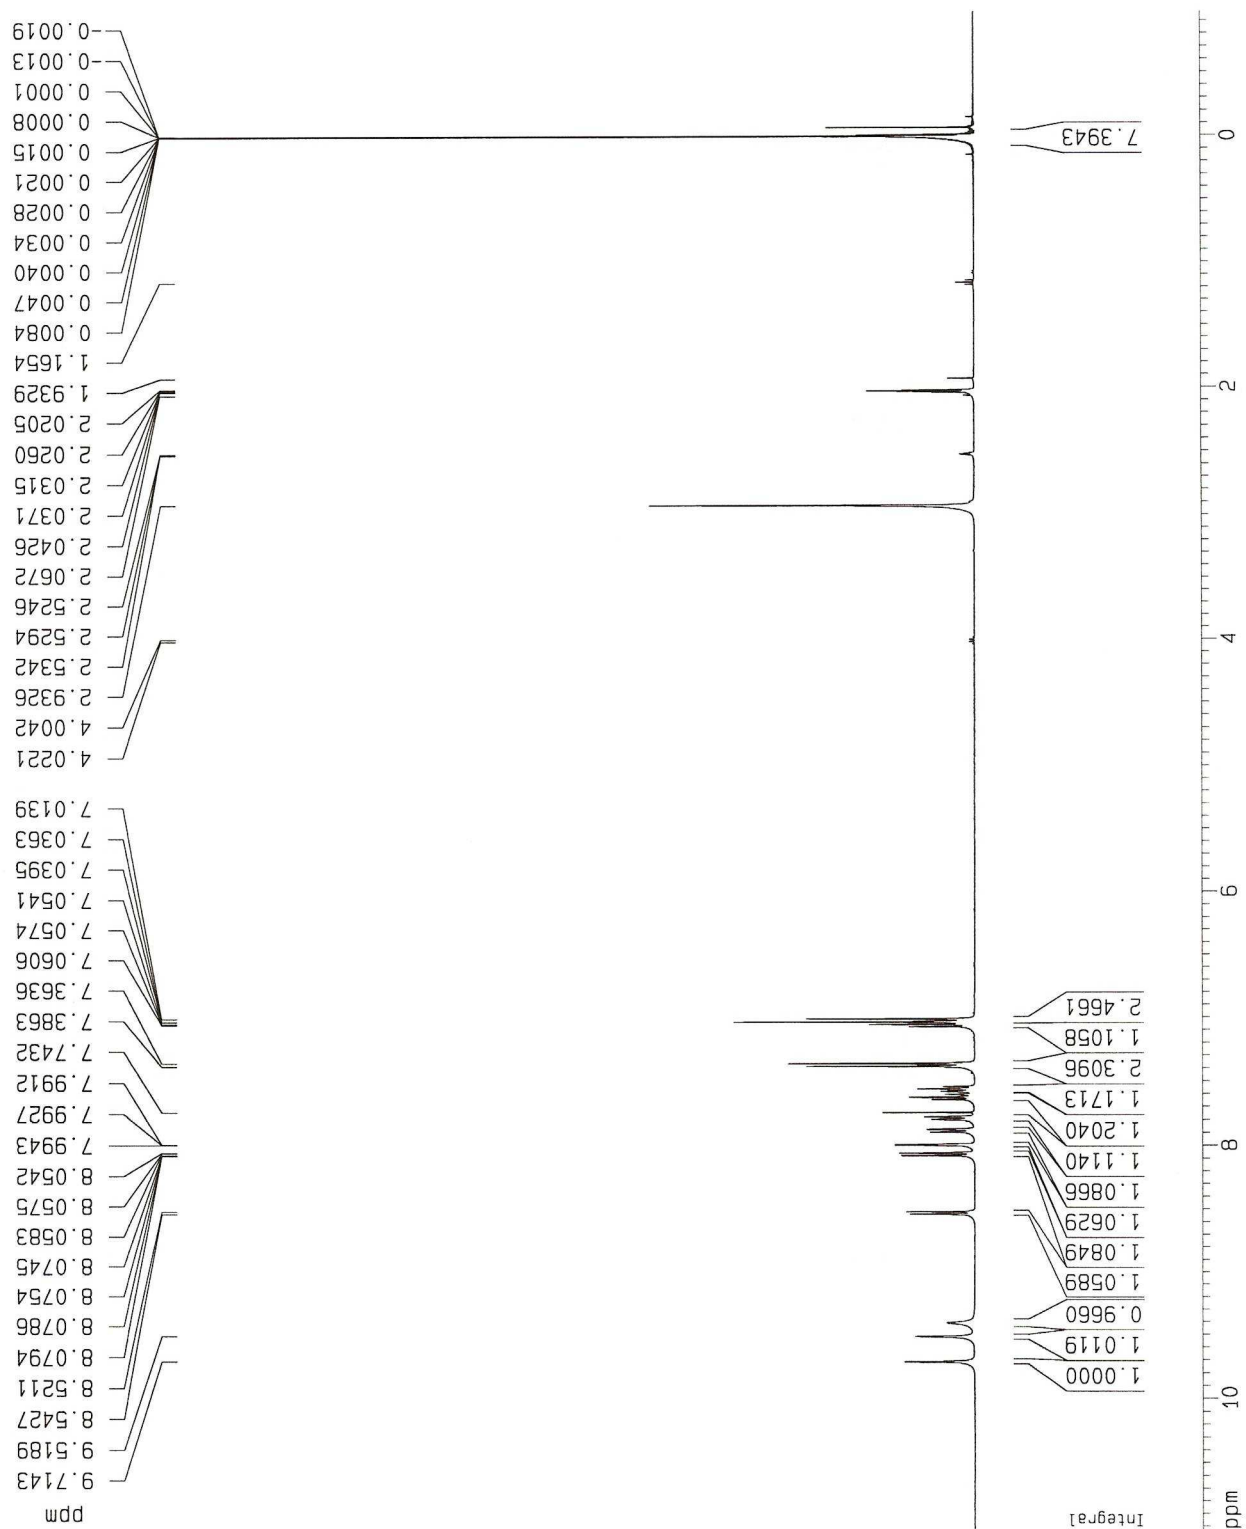

# <sup>1</sup>H NMR Spectrum of Compound 7{3,13}

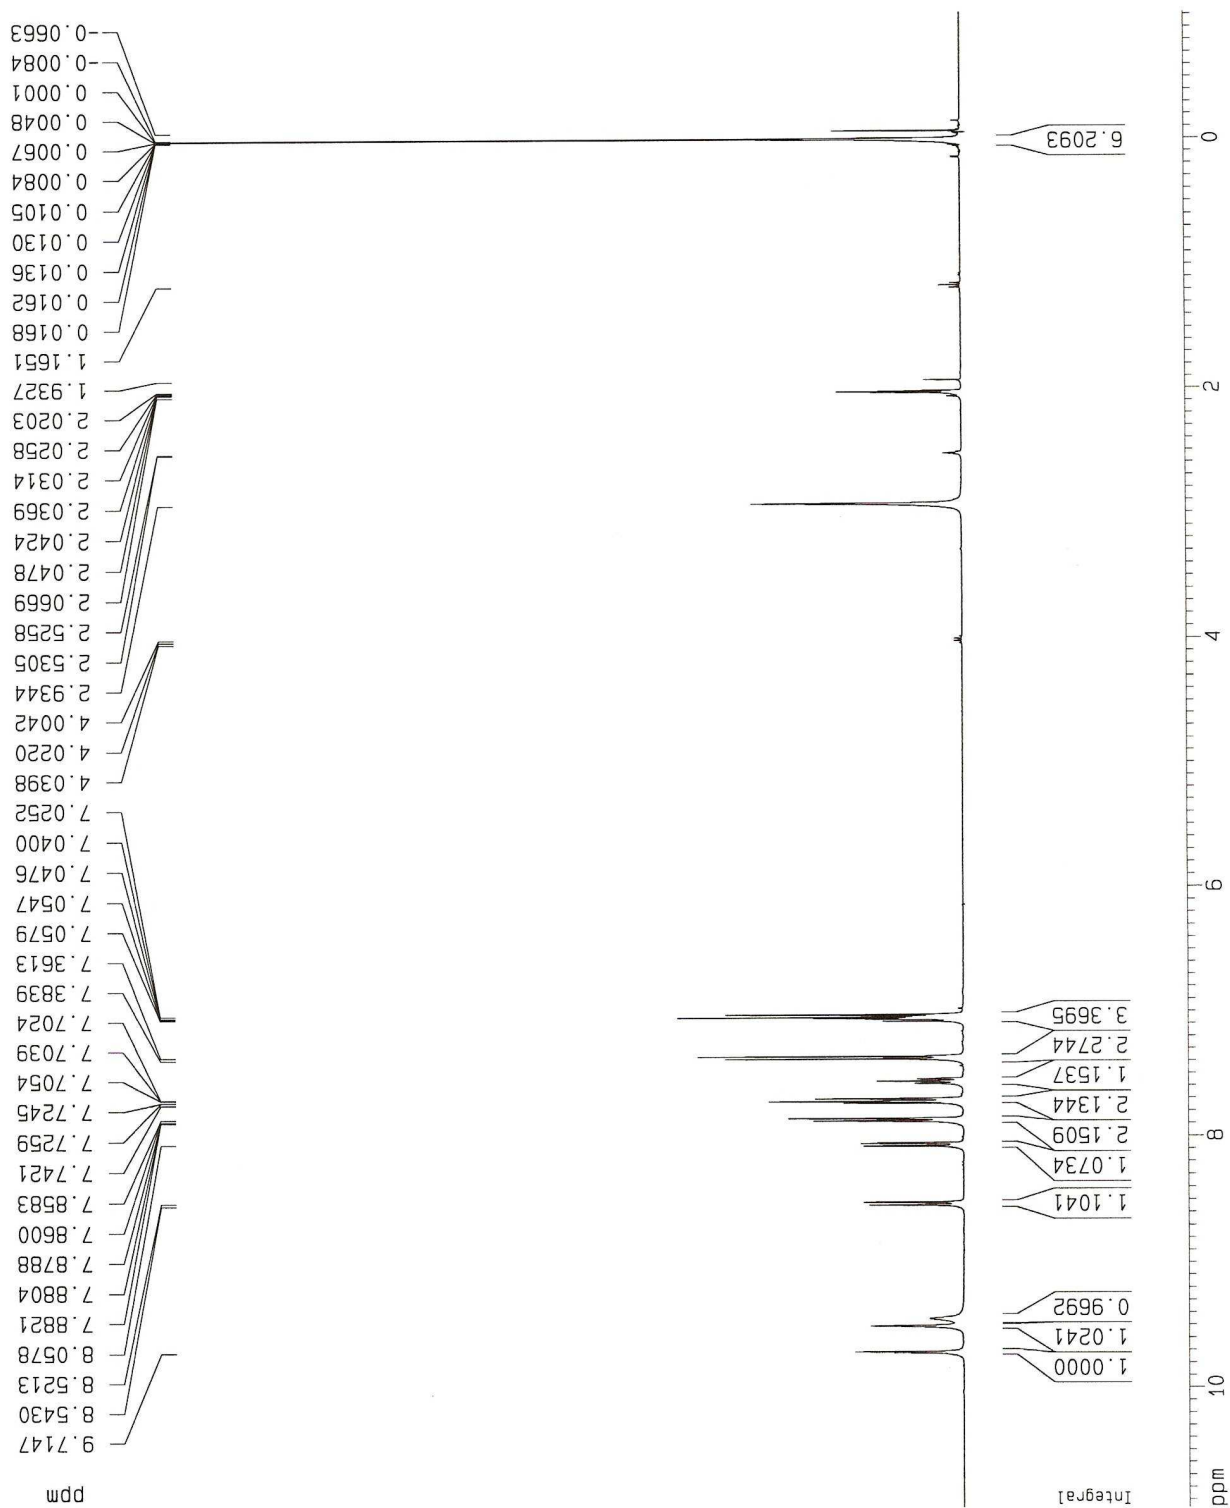

# <sup>1</sup>H NMR Spectrum of Compound 7{3,14}

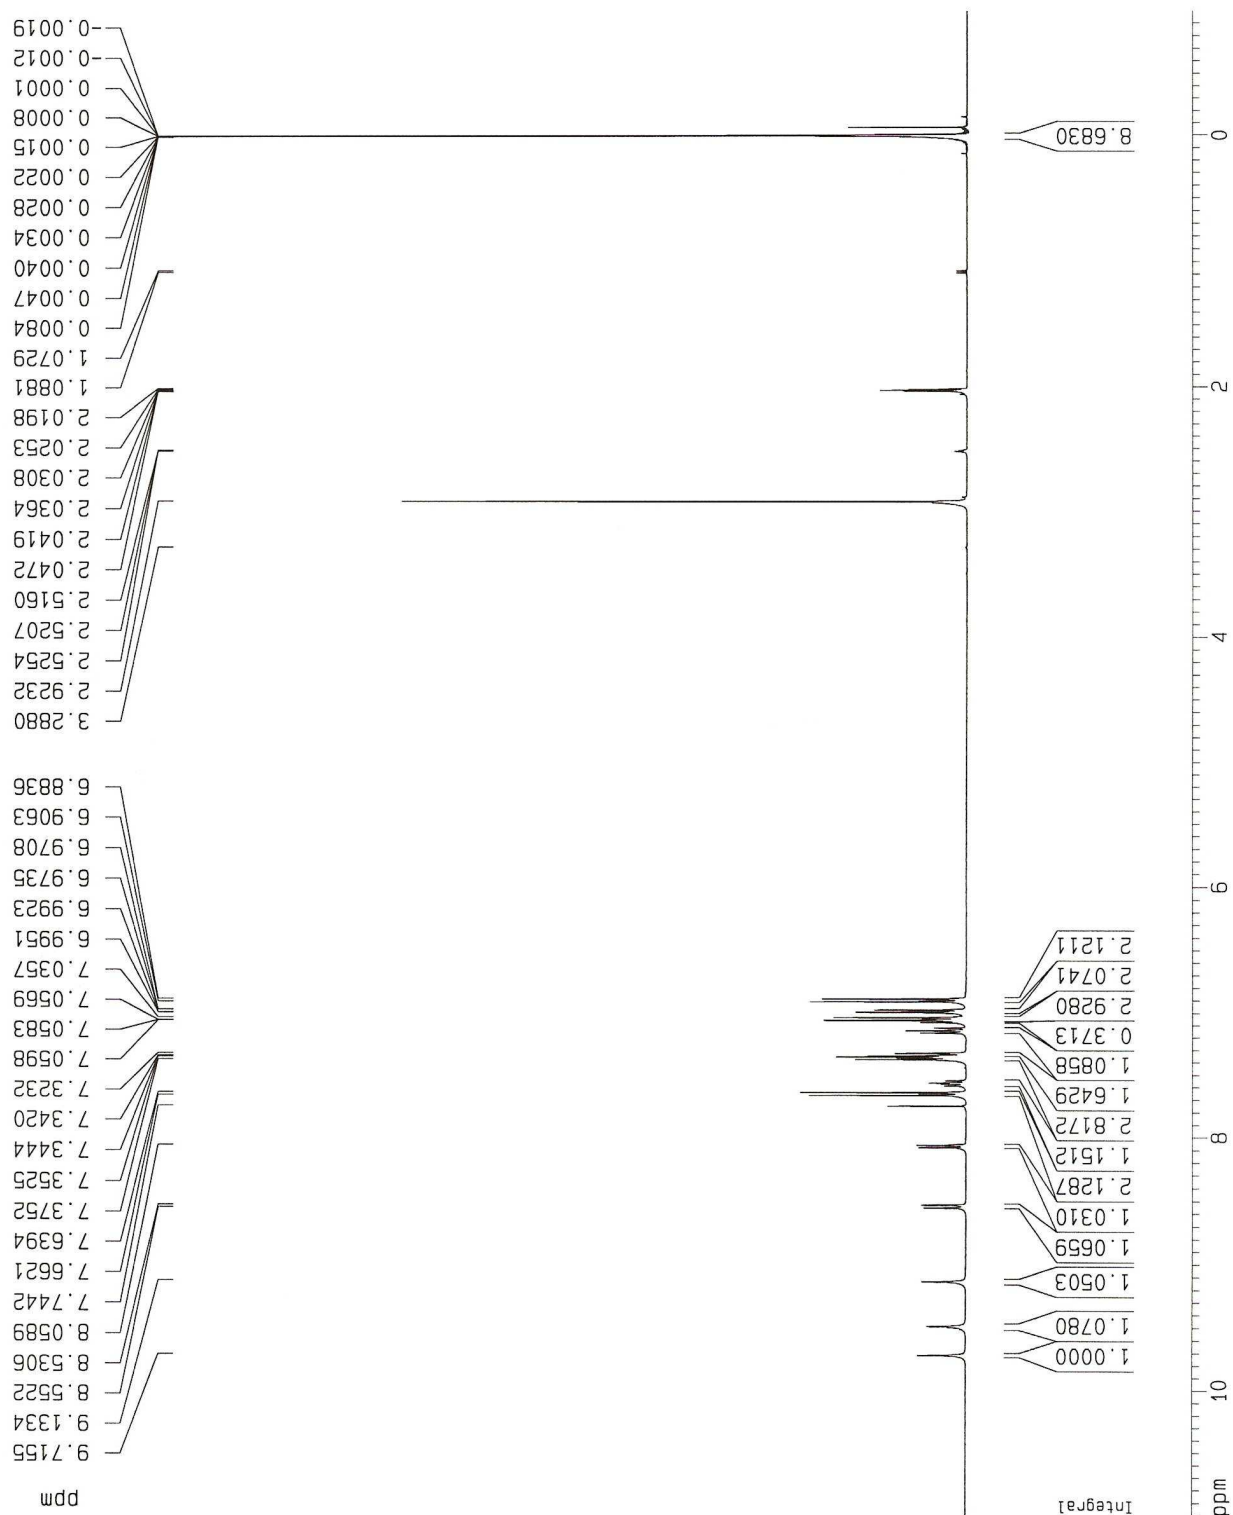

# <sup>1</sup>H NMR Spectrum of Compound 7{2,16}

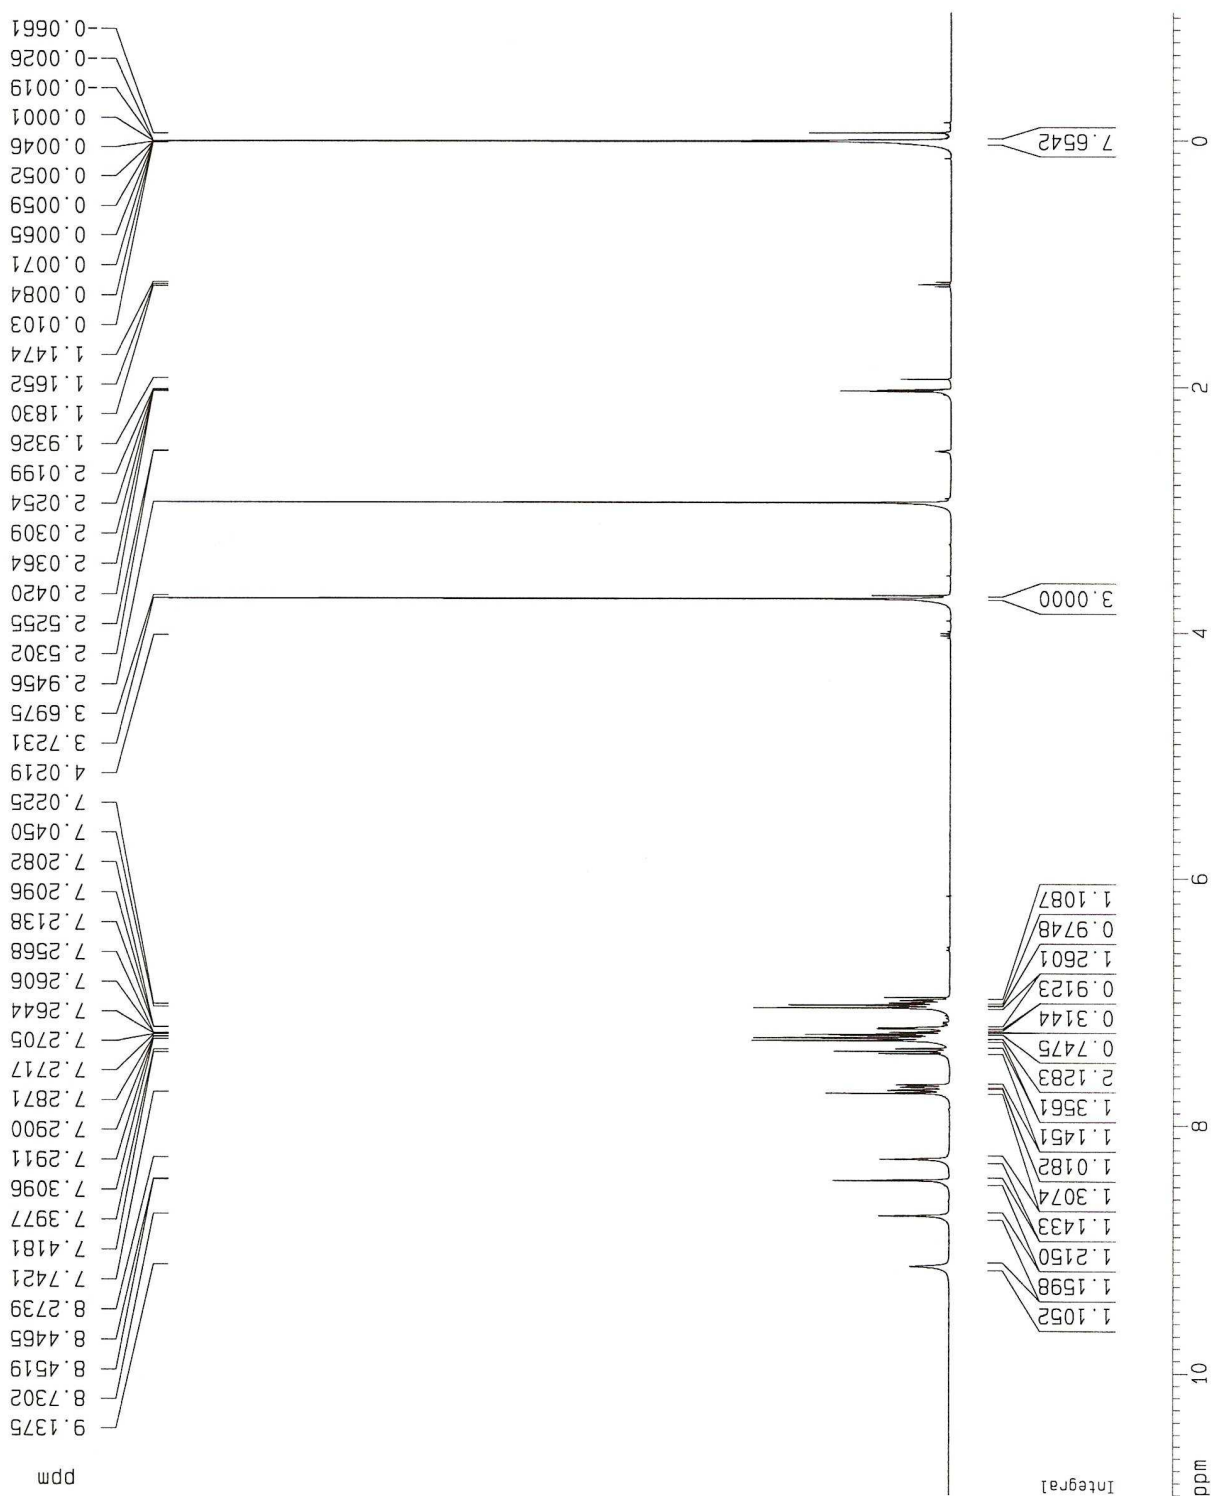



# <sup>1</sup>H NMR Spectrum of Compound 7{1,17}

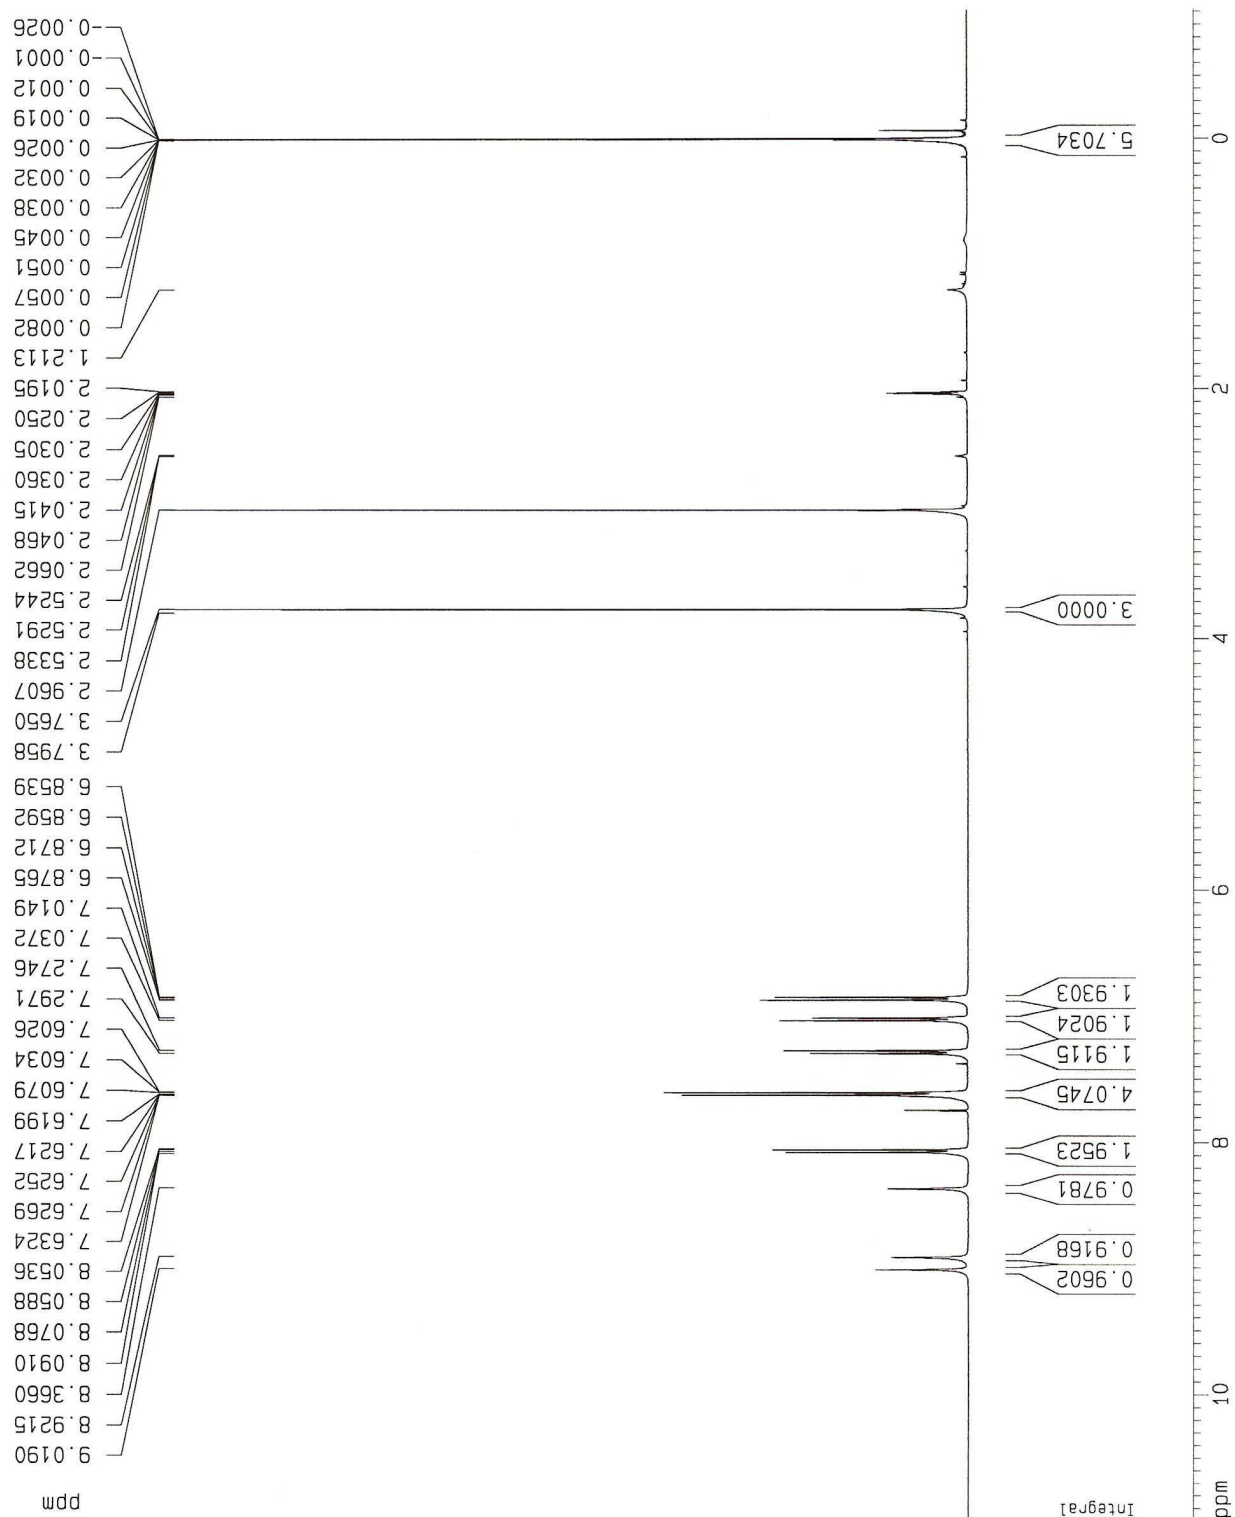

# <sup>1</sup>H NMR Spectrum of Compound 7{2,19}

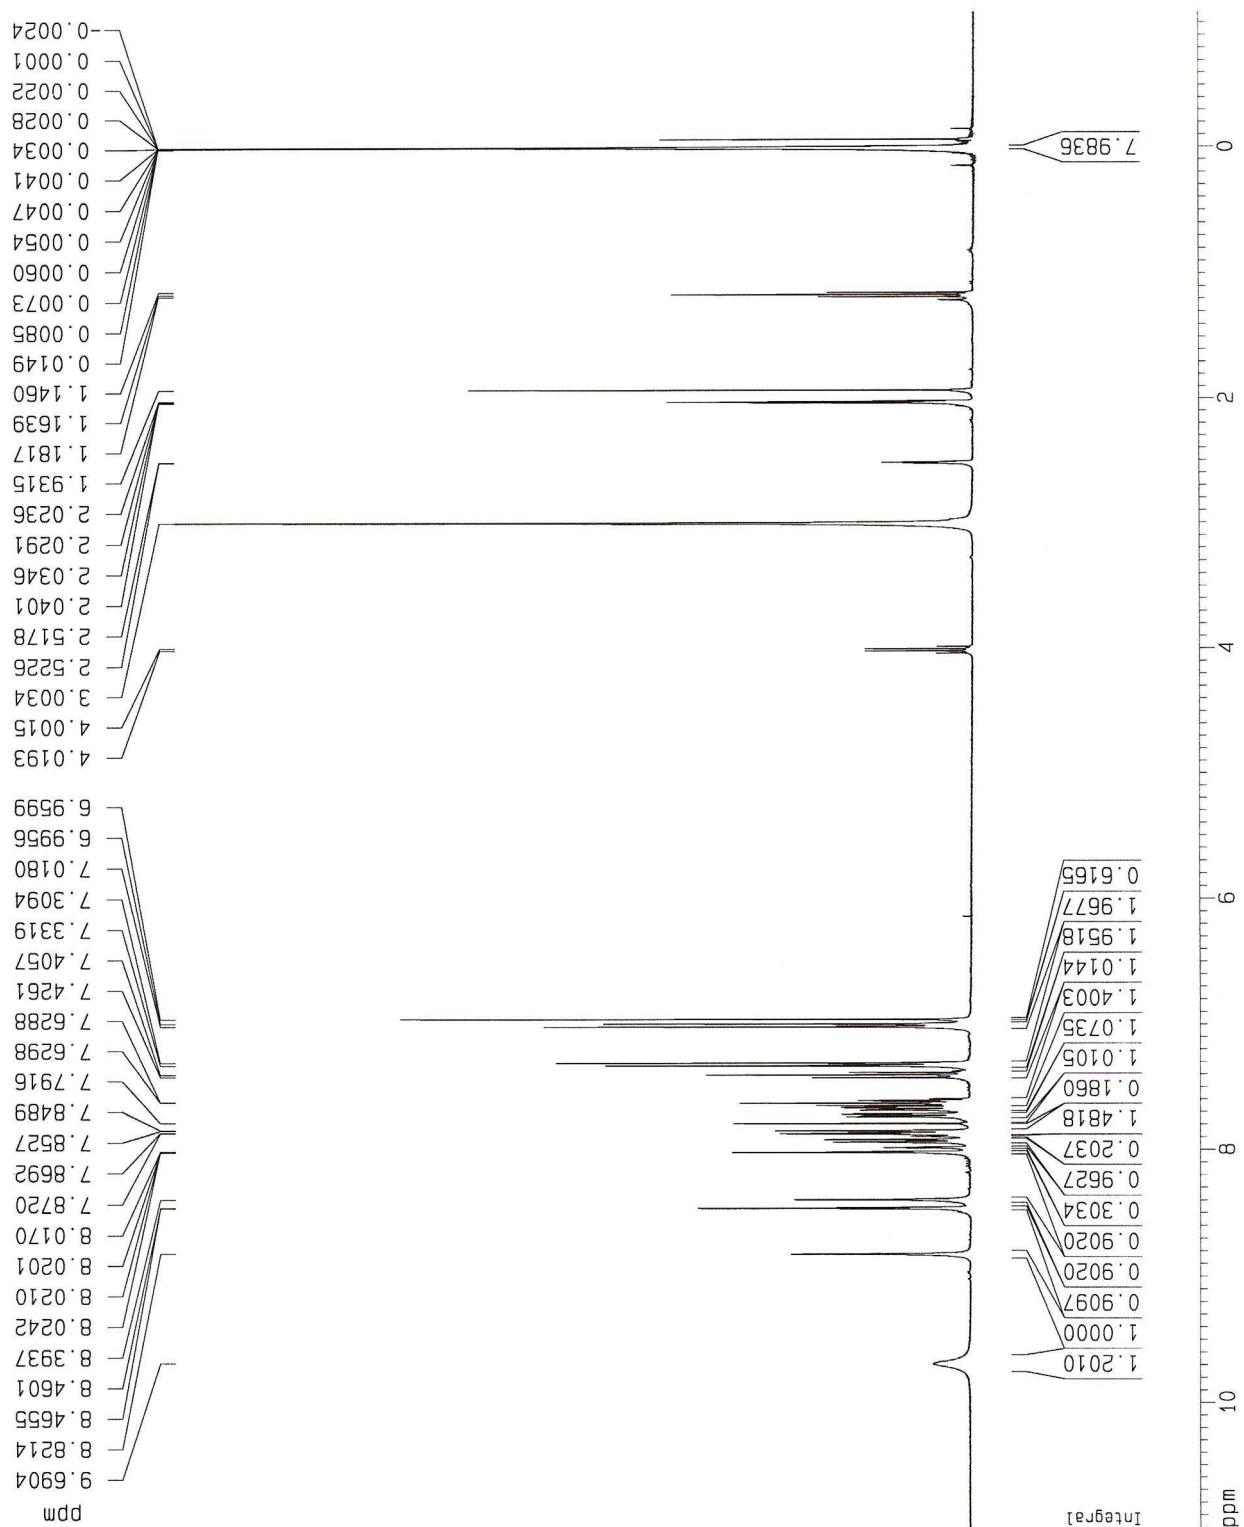

# <sup>1</sup>H NMR Spectrum of Compound 7{2,20}

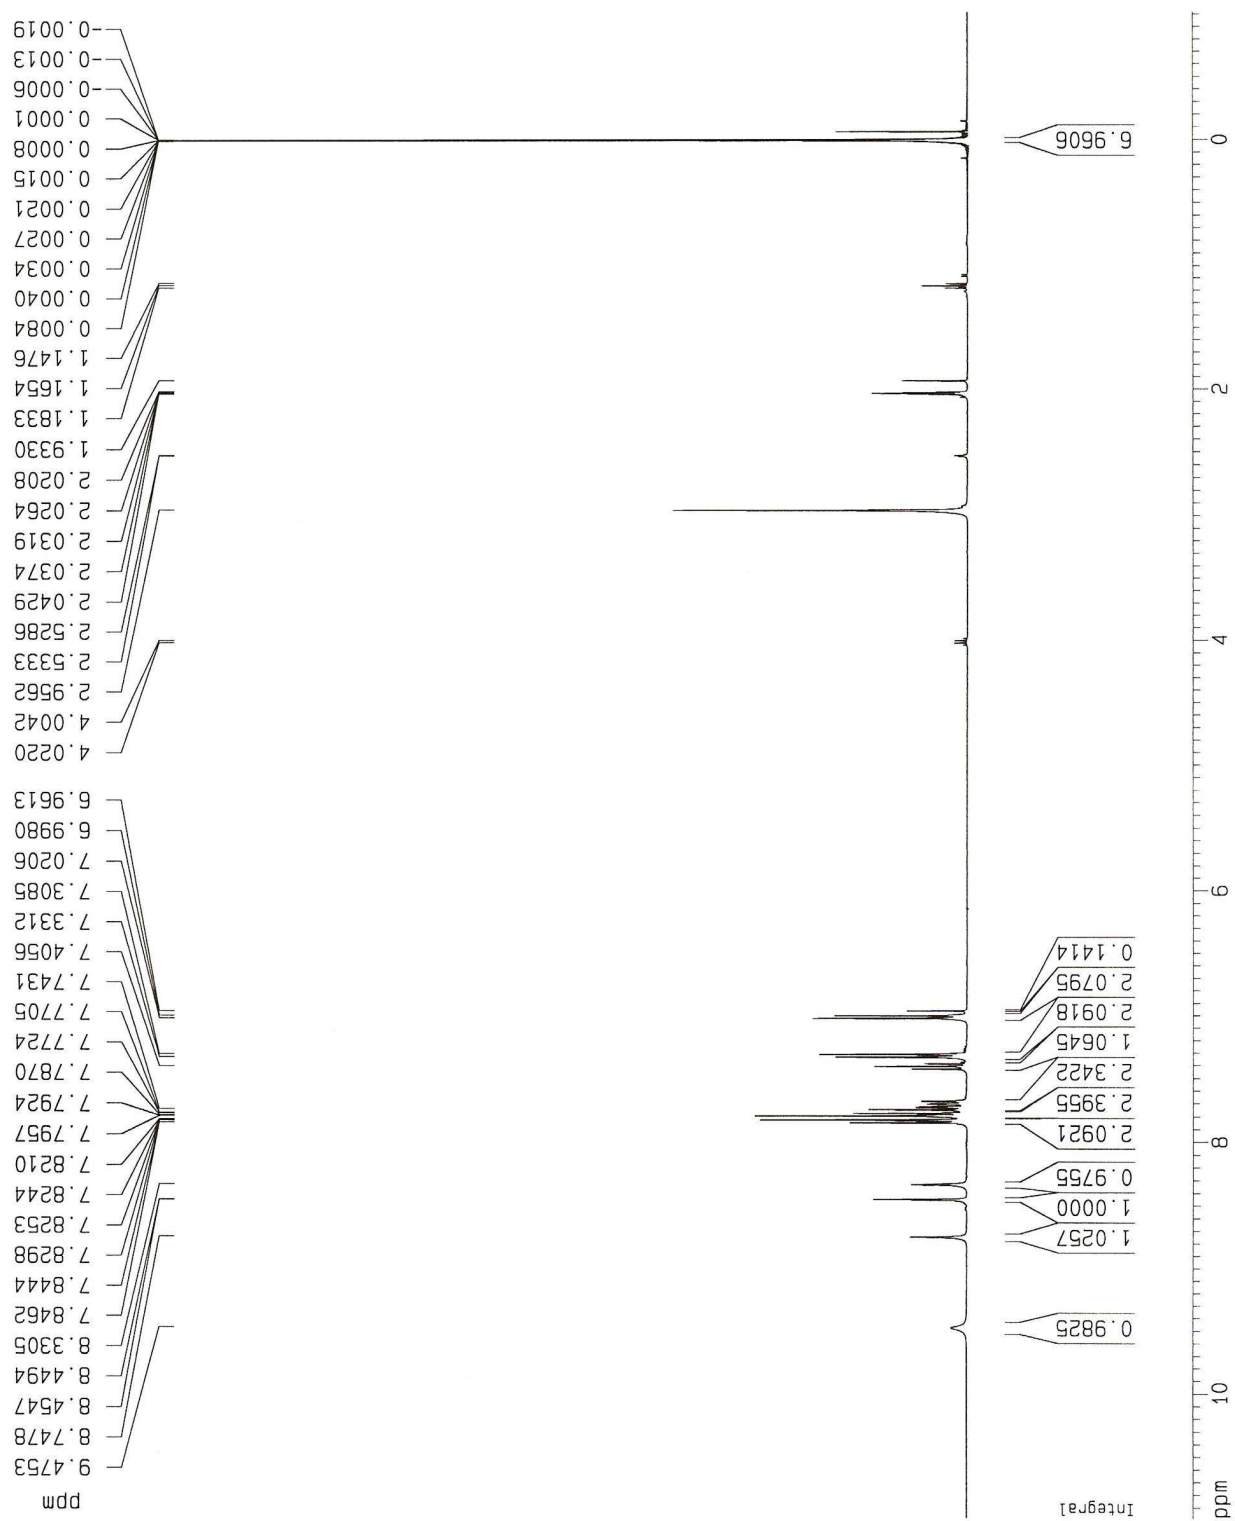

# <sup>1</sup>H NMR Spectrum of Compound 7{1,22}

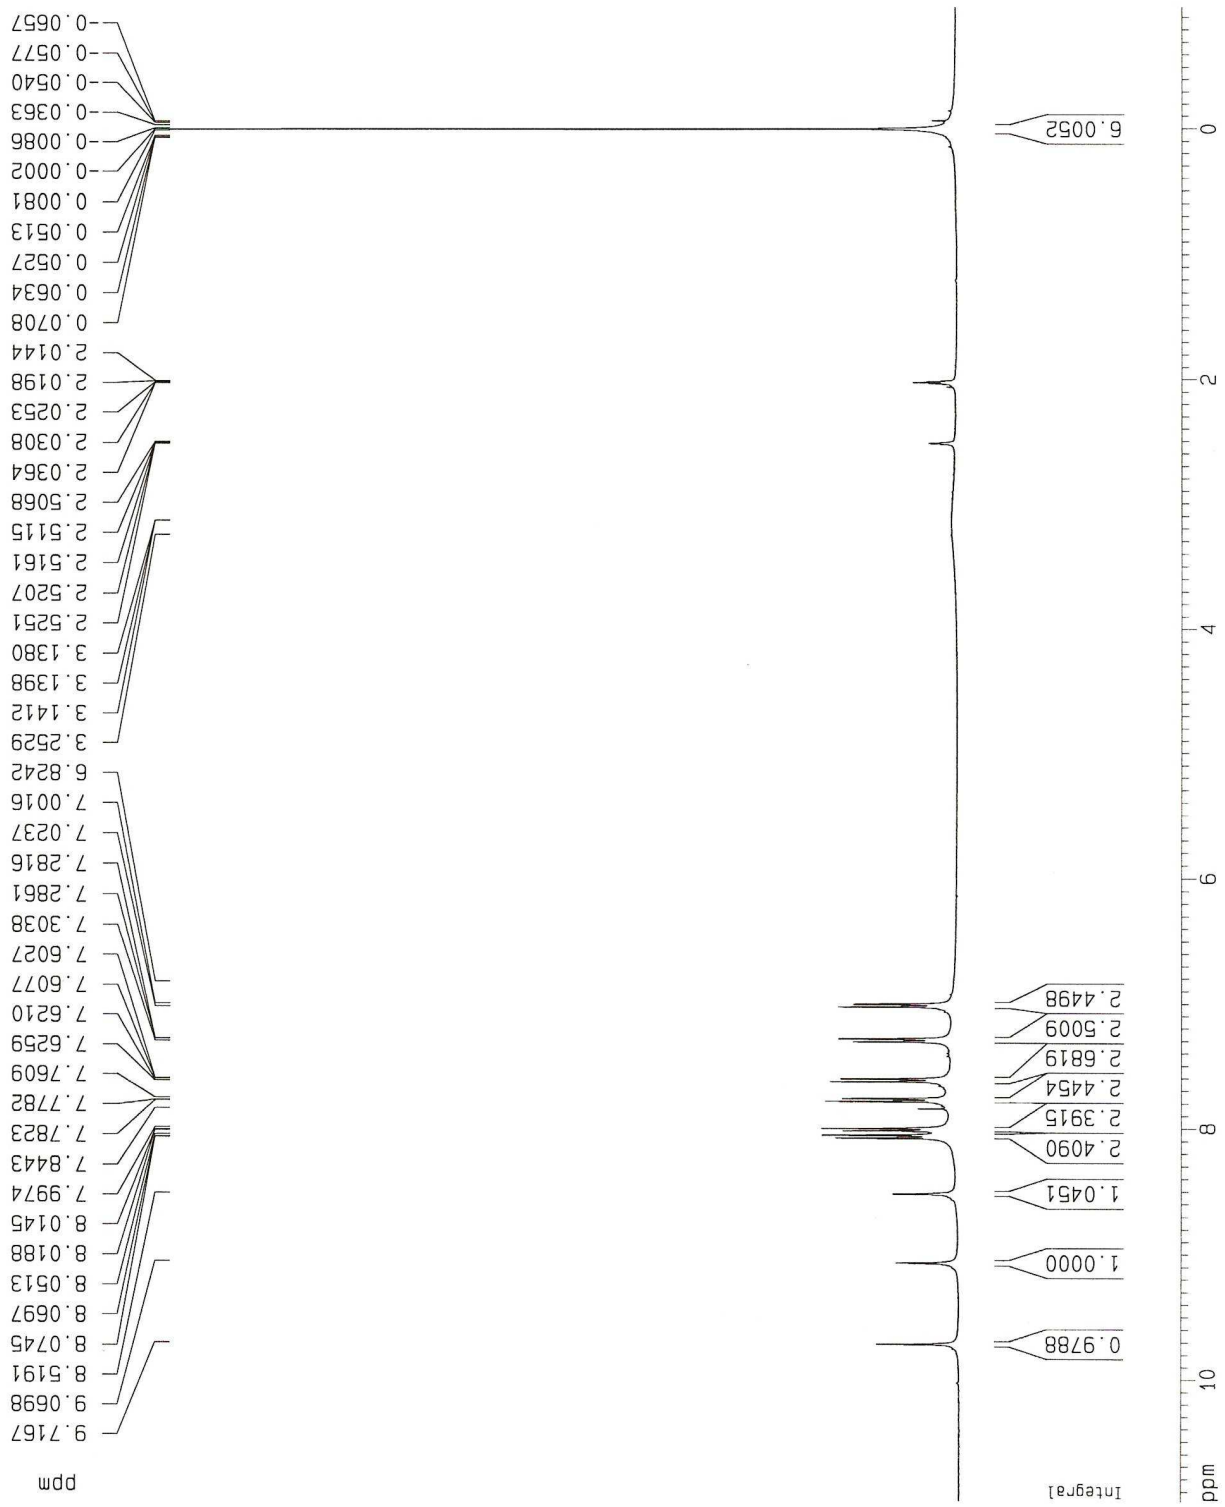

# <sup>1</sup>H NMR Spectrum of Compound 7{2,22}

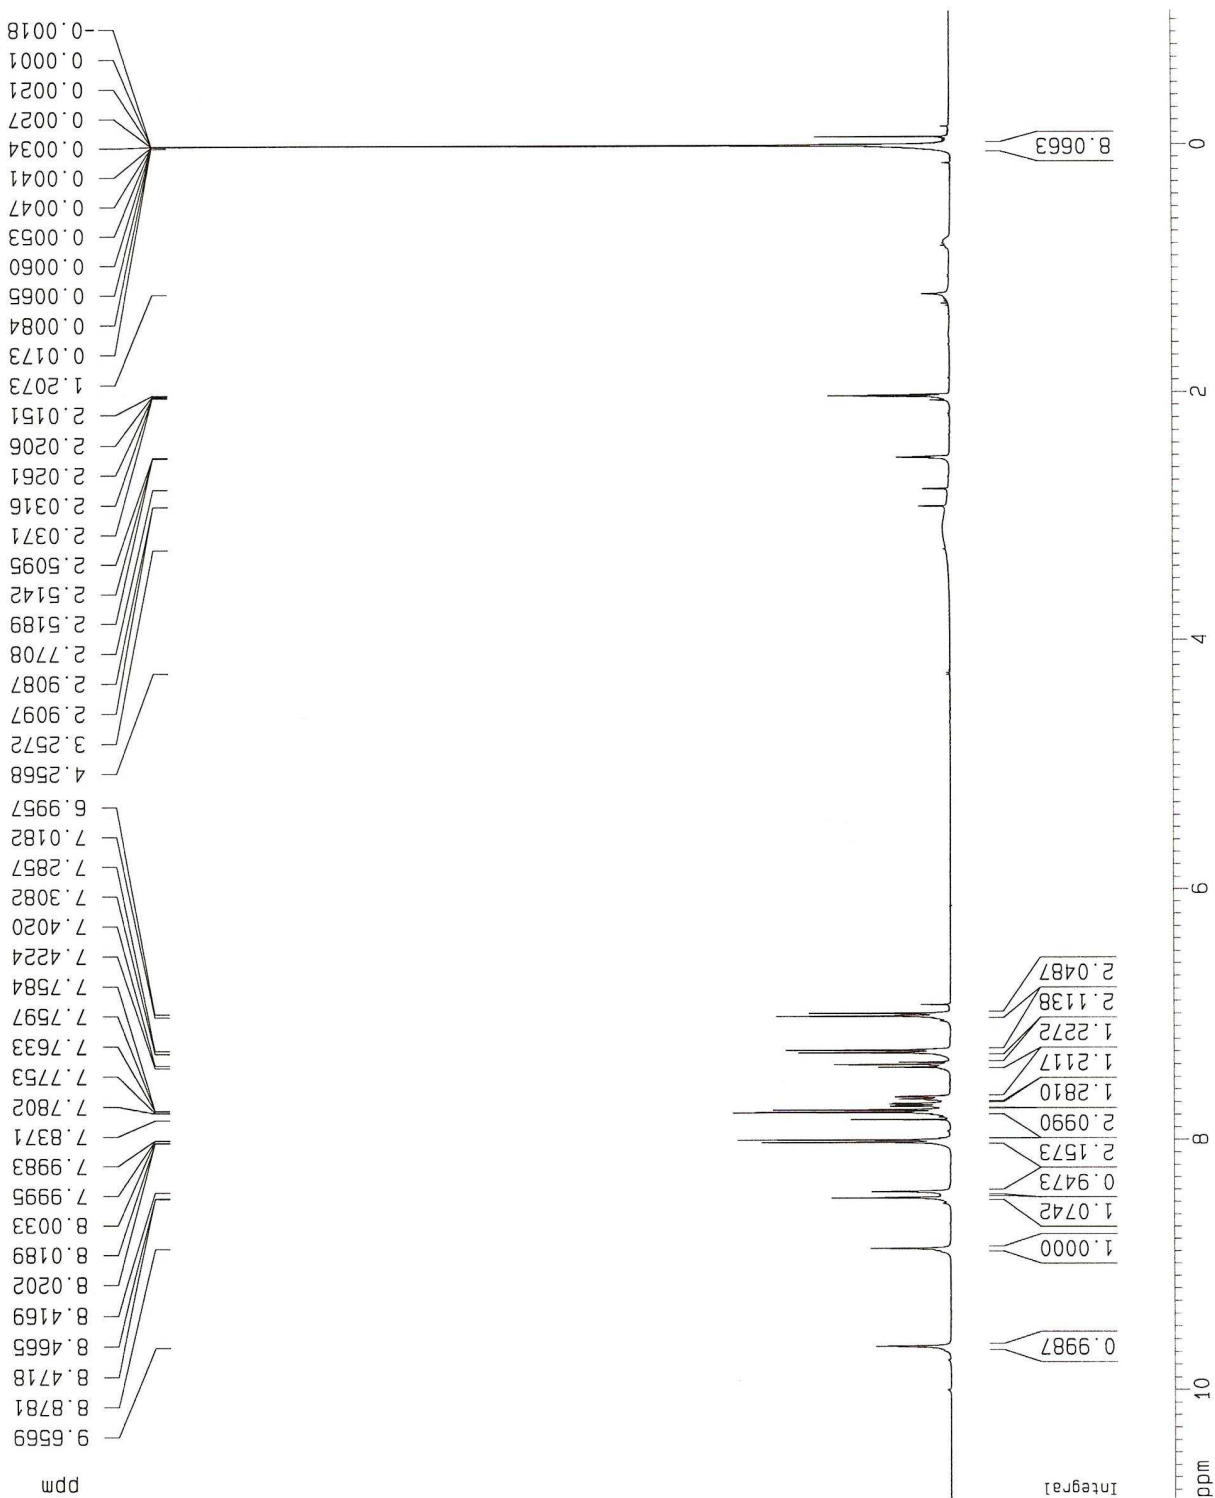

Supplement: NIHMS115164-supplement-1_si_001.pdf [file NIHMS115164-supplement-1_si_001.pdf]
